# Supplementary material for: Colon Tumors in Enterotoxigenic Bacteroides fragilis (ETBF)-Colonized Mice Do Not Display a Unique Mutational Signature but Instead Possess Host-Dependent Alterations in the APC Gene
Source: PubMed Central journal article supplement (PMC9241831; doi:10.1128/spectrum.01055-22), 2022-05-19
Supplement: spectrum.01055-22-s002.pdf [file spectrum.01055-22-s002.pdf]

1 Supplemental Material

2

3 A.)

4

5

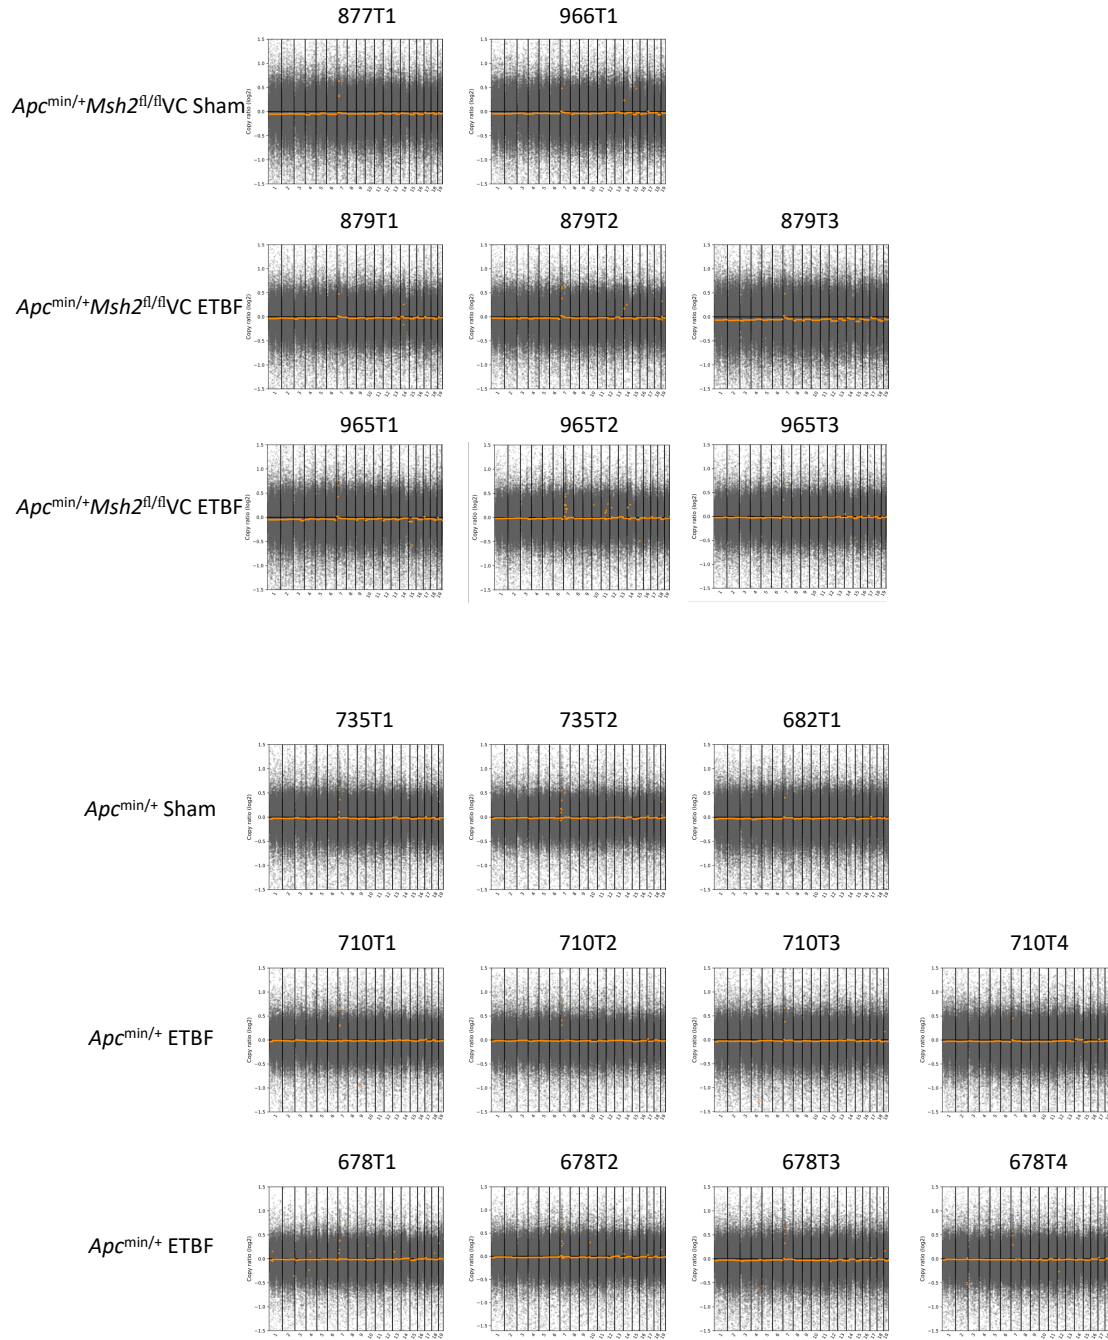

6

7

8

9

10

11

12

13

14  
15

**B.)**

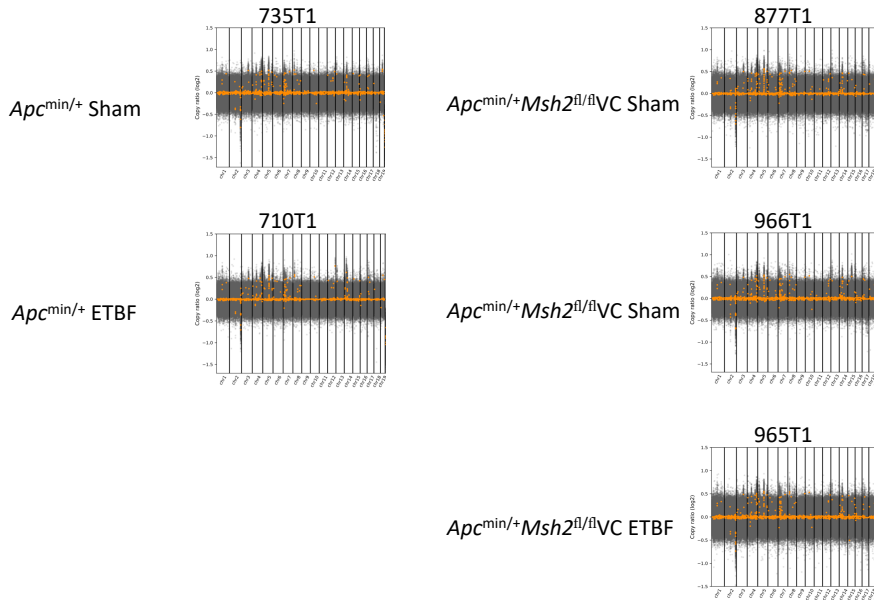

16  
17

**Figure S1: Copy number alterations on each autosomal chromosome are seen sparingly across**

18

**the genome for both sham-inoculated and ETBF-colonized tumor samples**

19

CNVkit was used to measure copy number alterations. Each gray dot represents an individual

20

data point and the orange lines/dot represent the average copy number variation over a given

21

region. The vertical axis is log<sub>2</sub> copy ratio. A log<sub>2</sub> copy ratio of 0 represents no difference in

22

copy number at that particular location between the tumor sample and a normal sample from

23

the same mouse. The horizontal axis displays the results from chromosome 1 (left) to

24

chromosome 19 (right). **A.)** Copy number alteration in samples analyzed via whole exome

25

sequencing. **B.)** Copy number alterations in samples analyzed via whole genome sequencing. All

26

data are shown as results for individual tumors from mouse strains as labeled above each figure

27

(mouse number, tumor (T) number).

28

29  
30  
31

A.)

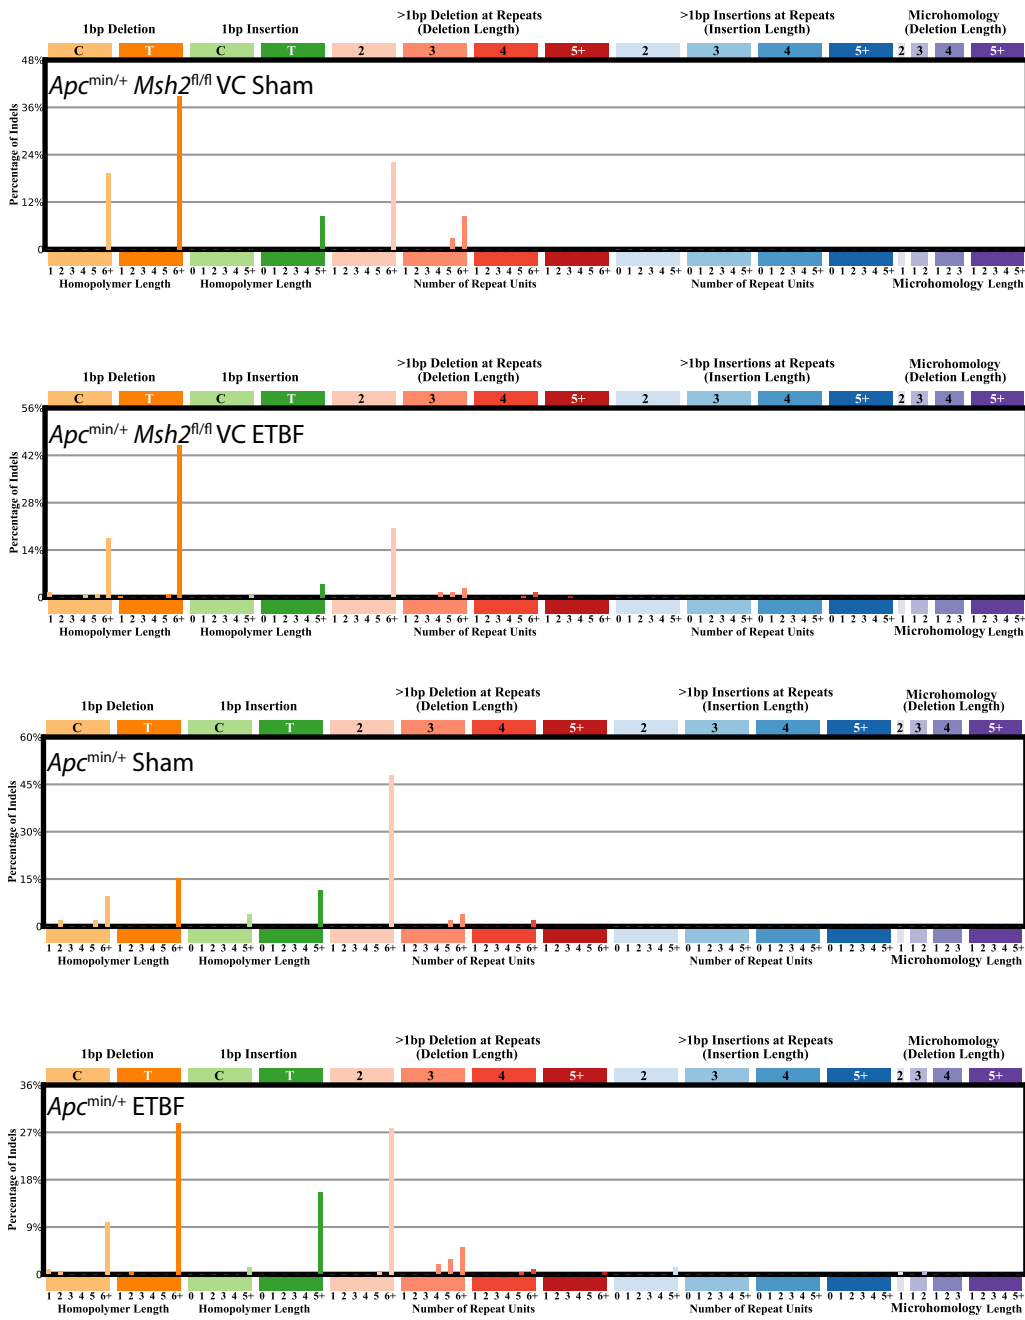

32  
33  
34  
35  
36  
37

38  
39  
40

B.)

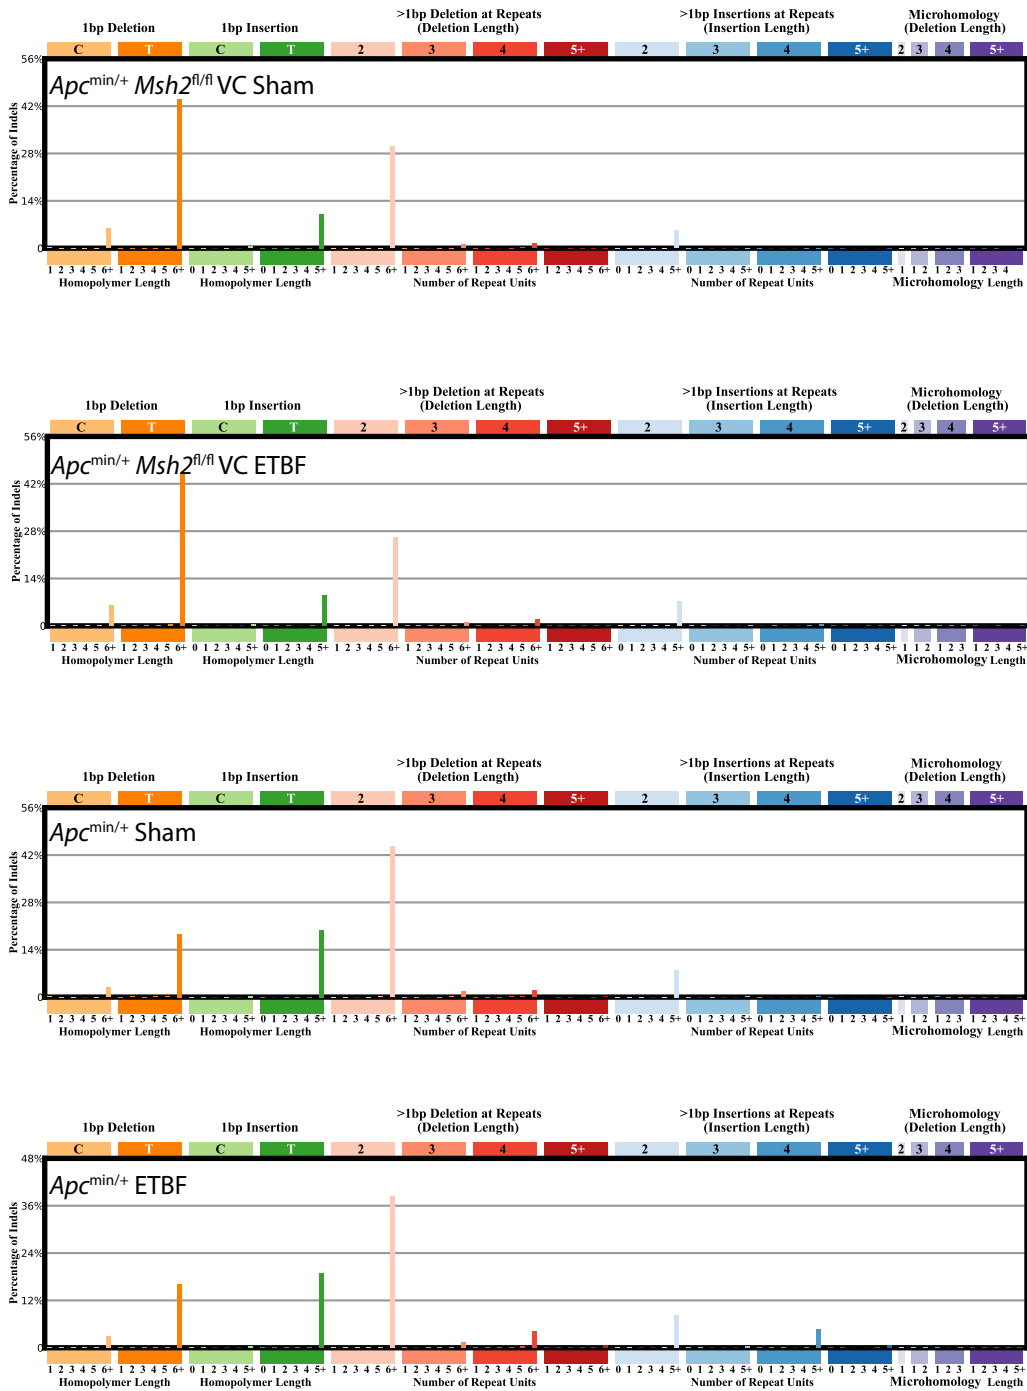

41  
42  
43

44 **Figure S2: Mutational profiles of Insertions/deletions (Indels) show no differences between**  
45 **groups**

46 The R package SigProfilerMatrixGenerator was used to create Indel mutational profiles. Indel  
47 mutational profiles are presented in the 83-mutation type format. This format groups Indels  
48 based on several criteria including size of the indel, nucleotides affected and the presence of  
49 the indel in a repetitive region and/or microhomology region. Note, Y-axis differs between  
50 samples. **A.)** Indel mutational profile of whole exome sequencing data in the 83-mutation type  
51 format. **B.)** Indel mutational profile of whole genome sequencing data in the 83-mutation type  
52 format.

53

54  
55  
56

A.)

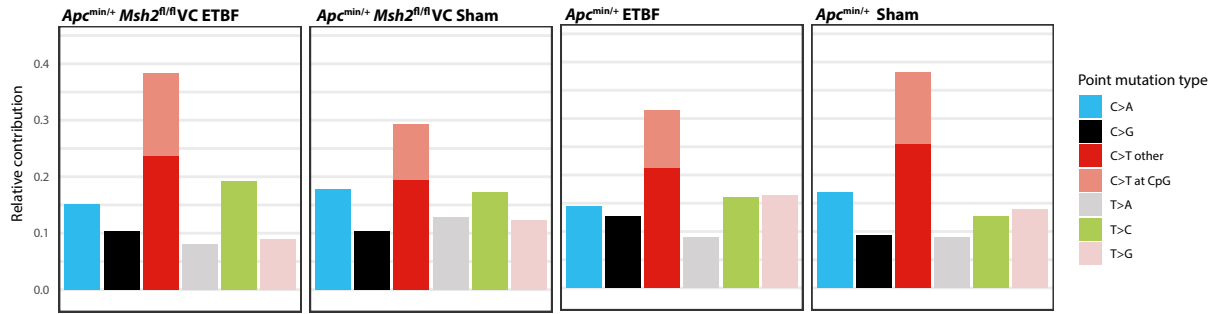

57  
58  
59

B.)

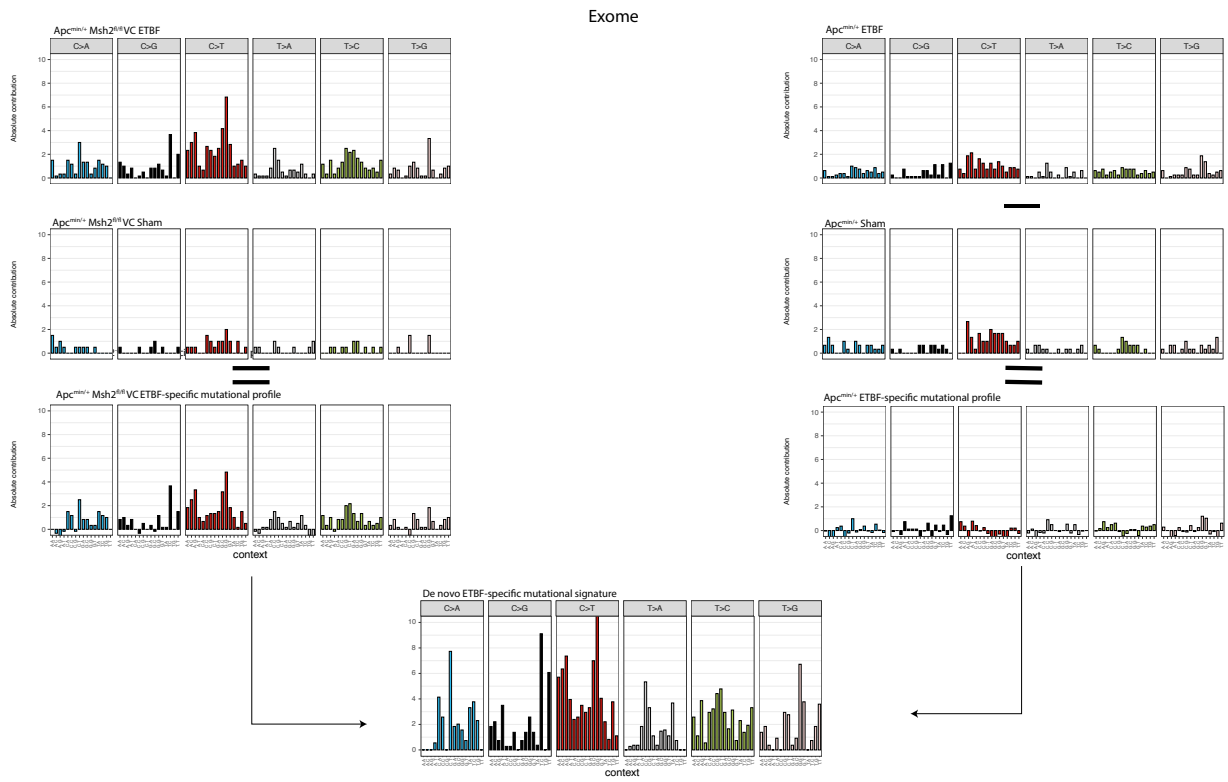

60  
61  
62

C.)

63

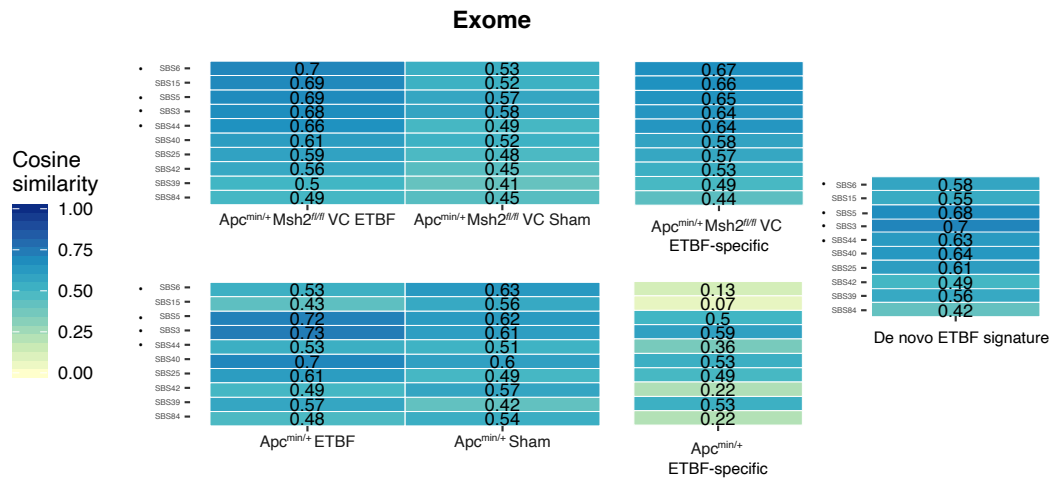

64

65 **Figure S3: ETBF-specific single base substitution (SBS) mutational profiles extracted from**

66 **exome sequencing data**

67 The R package MutationalPatterns was used to create SBS mutational profiles. **A.)** SBS

68 mutational profile for whole exome sequencing data in the 6-mutation type format. In the 6-

69 mutation type format, mutations are divided into 6 simple categories: C > A, C > G, C > T, T > A,

70 T > C, T > G. Additionally, C > T mutations are further subdivided into those that occur within a

71 CpG dinucleotide context, and those that do not. **B.)** Graphic detailing how the ETBF-specific

72 mutational profiles were created from the whole exome sequencing data in the 96-mutation

73 type format. In the 96-mutation type format, the 6 mutations outlined above are further

74 subdivided into 16 categories. These categories represent the 16 combinations of nucleotides

75 immediately 5' and 3' to each mutated base. The total number of mutations belonging to each

76 trinucleotide mutation type is presented. **C.)** Heatmaps comparing SBS COSMIC signatures

77 (vertical axis) to the mutational profiles created from whole exome sequencing data in *Apc*<sup>min/+</sup>

78 mice and *Apc*<sup>min/+</sup>*Msh2*<sup>fl/fl</sup>VC mice. Numbers displayed represent “cosine similarity”, which is a

79 metric used to quantify the similarity between any two mutational matrices. Only the top 10

80 COSMIC SBS signatures are shown. Dots indicate mutational profiles most similar to ETBF  
81 signature across multiple analyses.  
82



83 A.)

84

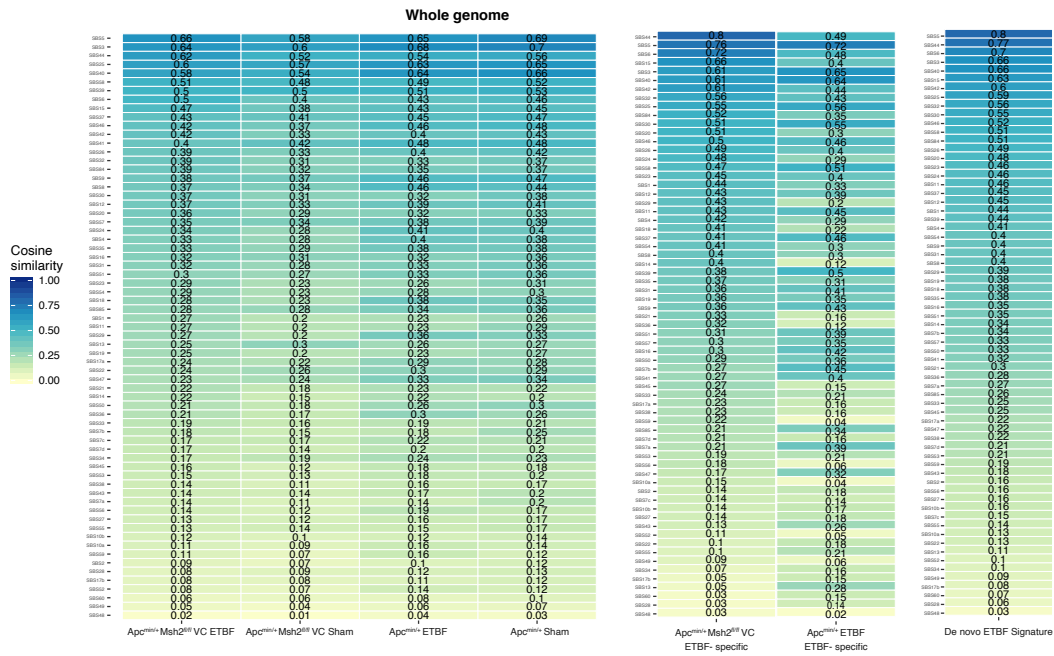

85

86

87

B.)

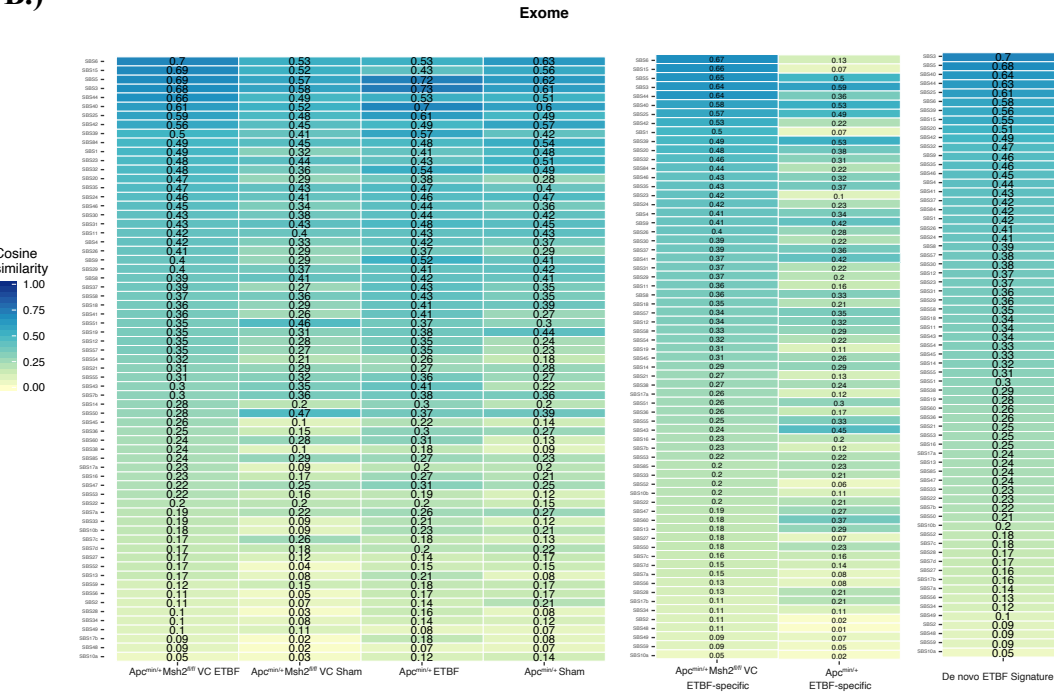

88

89

90

C.)

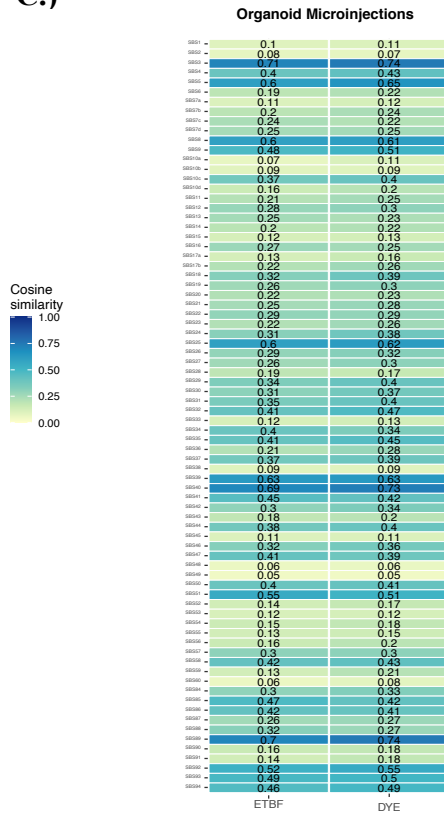

91

92

93 **Figure S4: Mutational profiles compared to COSMIC single base substitution (SBS) signatures**

94 Heatmaps comparing SBS COSMIC signatures (vertical axis) to the ETBF-specific mutational

95 profiles created from tumors from Sham mice, tumors from ETBF-colonized mice, the ETBF-

96 specific mutational profile, and the *de novo* ETBF-specific signatures. Numbers displayed

97 represent “cosine similarity”, which is a metric used to quantify the similarity between any two

98 mutational matrices. All COSMIC SBS signatures are shown. **A.)** Whole genome sequencing data

99 in *Apc*<sup>min/+</sup> mice and *Apc*<sup>min/+</sup>*Msh2*<sup>fl/fl</sup>*VC* mice. **B.)** Exome sequencing data in *Apc*<sup>min/+</sup> mice and

100 *Apc*<sup>min/+</sup>*Msh2*<sup>fl/fl</sup>*VC* mice. **C.)** Whole genome sequencing data from human organoids.

101
